# Supplementary material
Source: Research Square preprint supplement (doi:10.21203/rs.3.rs-6264819/v1)
Supplement: Supplementary file 1 [file 5f985bed5c0a762b142dd72d.xlsx]

## Sheet: Humerus 
TECNICA	EDAD	GENERO	Corticalthickness	Corticalthickness2	promediocorticalthickness	TALLA	PESO	IMC	COMORBILIDADES	TIPODEFRACTURA	TIEMPOQUIRURGICOMIN	SANGRADOML	DOLORPOSOPERATORIO	PSEUDOARTROSIS	LESIÓNRADIAL	UCLA3MESES	UCLA6MESES	MEPS3MESES	MEPS6MESES	TIEMPODECONSOLIDACIONSEMANAS	TIEMPOFRACTURACIRUGIADIAS	Obs1	Obs2
1	37	1	6.4	6.3	6.35	1.7	65	22.4913	1	3	100	150	7	1	1	24	35	100	100	15.6	1	15.6	51
1	45	1	7.4	7.1	7.25	1.75	70	22.8571	1	3	55	100	5	1	1	29	33	100	100	12.6	1	12.6	28.5
1	27	2	8	8	8	1.65	67	24.6097	1	3	50	50	1	1	1	33	35	100	100	20.1	7	20.1	31.5
1	45	1	7.2	7.1	7.15	1.59	62	24.5243	3	3	90	100	4	1	1	26	28	85	85	14.6	14	14.6	18
1	43	2	5.6	5.5	5.55	1.5	56	24.8889	1	3	120	100	4	1	1	33	35	100	100	7.6	1	7.6	10.6
1	29	1	6.4	6.4	6.4	1.7	60	20.7612	1	6	105	150	4	1	1	25	35	100	100	16.4	1	16.4	16.4
1	44	1	7.8	7.7	7.75	1.7	74	25.6055	1	3	55	200	4	2	1	#NULL!	#NULL!	#NULL!	#NULL!	#NULL!	0	0	0
1	45	2	5.9	5.8	5.85	1.52	56	24.2382	2	4	90	50	5	1	1	29	35	100	100	8.4	0	8.4	8.4
1	35	2	5.7	5.7	5.7	1.65	57	20.9366	1	2	60	50	7	1	1	33	35	100	100	8.2	0	8.2	8.2
1	46	1	6.9	6.8	6.85	1.72	69	23.3234	5	4	50	150	2	1	1	26	34	95	100	30.2	0	30.2	33.5
1	38	2	6.1	6.1	6.1	1.56	59	24.2439	1	1	90	100	4	1	1	33	35	100	100	20.2	2	20.2	20.2
1	45	2	6.8	6.9	6.85	1.57	60	24.3418	3	3	90	250	1	1	1	34	35	100	100	14.1	1	14.1	14.1
1	23	1	7.1	7.2	7.15	1.75	73	23.8367	1	3	90	200	8	1	1	23	34	80	100	12.5	0	12.5	28.5
2	28	1	7.3	7.3	7.3	1.66	59	21.4109	1	4	90	200	6	2	2	#NULL!	#NULL!	#NULL!	#NULL!	#NULL!	2	0	0
2	38	2	6.5	6.4	6.45	1.53	58	24.7768	3	1	90	100	6	1	2	24	33	100	100	4.2	1	4.2	8.3
2	22	2	5.9	5.8	5.85	1.56	60	24.6548	1	1	120	200	4	1	1	29	33	100	100	19.4	6	19.4	42.3
2	24	1	7	7.1	7.05	1.55	56	23.3091	1	4	130	500	7	1	1	20	35	95	100	9.5	7	9.5	9.5
2	37	2	6.2	6.3	6.25	1.65	67	24.6097	2	3	70	200	10	1	1	25	27	100	100	8.4	45	8.4	8.4
2	35	1	6.9	6.8	6.85	1.71	69	23.597	1	4	100	200	8	1	1	29	33	100	100	20.5	4	20.5	20.5
2	41	1	6.6	6.6	6.6	1.6	63	24.6094	2	6	120	200	4	1	2	24	33	100	100	9.3	24	9.3	9.3
2	28	2	5.5	5.4	5.45	1.52	52	22.5069	1	1	90	300	7	1	1	20	29	95	100	11.5	11	11.5	11.5
2	32	2	5.9	5.7	5.8	1.56	55	22.6003	1	4	100	200	4	1	1	25	35	100	100	9.2	6	9.2	9.2
2	39	2	5	4.9	4.95	1.65	67	24.6097	1	4	80	150	7	2	1	#NULL!	#NULL!	#NULL!	#NULL!	#NULL!	0	0	0
2	40	1	7.6	7.4	7.5	1.75	71	23.1837	3	3	90	100	4	1	1	24	33	100	100	11.1	1	11.1	11.1
2	36	2	5.7	5.5	5.6	1.75	65	21.2245	1	1	110	220	7	1	1	24	35	100	100	6	3	6	6
2	42	2	6.3	6.3	6.3	1.57	59	23.9361	1	3	120	300	7	1	1	25	33	100	100	19	0	19	19
2	35	1	7.1	7	7.05	1.73	74	24.7252	1	3	85	150	6	1	1	29	35	100	100	8.5	1	8.5	8.5
2	40	2	5.3	5.5	5.4	1.61	62	23.9188	2	4	90	150	6	1	1	30	35	100	100	20.6	1	20.6	20.6
